# Supplementary material for: Traceable quantitation of cyanocobalamin (vitamin B12) via measurement of cobalt and phosphorus: a comparative assessment using inductively coupled plasma atomic emission spectrometry (ICP-AES) and ion chromatography (IC)
Source: Royal Society of Chemistry journal article supplement (doi:10.1039/c6ra16637g), 2016-01-01
Supplement: c6ra16637g1.pdf [file c6ra16637g1.pdf]

### **Supplementary information**

**MS Title:** Traceable quantitation of Cyano-cobalmin (Vitamin B<sub>12</sub>) via measurement of cobalt and phosphorus: a comparative assessment by Inductively Coupled Plasma Atomic Emission Spectrometry (ICP-AES) and Ion Chromatography (IC).

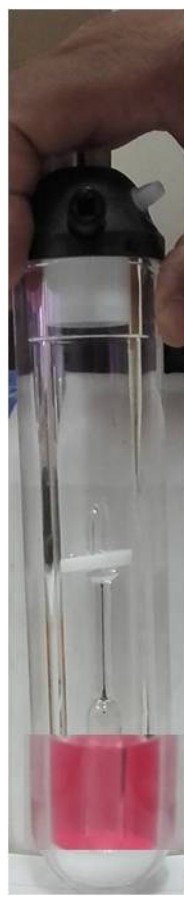

**Supplementary figure 1:** A unit arrangement of quartz digestion vessel along with UV-lamps.

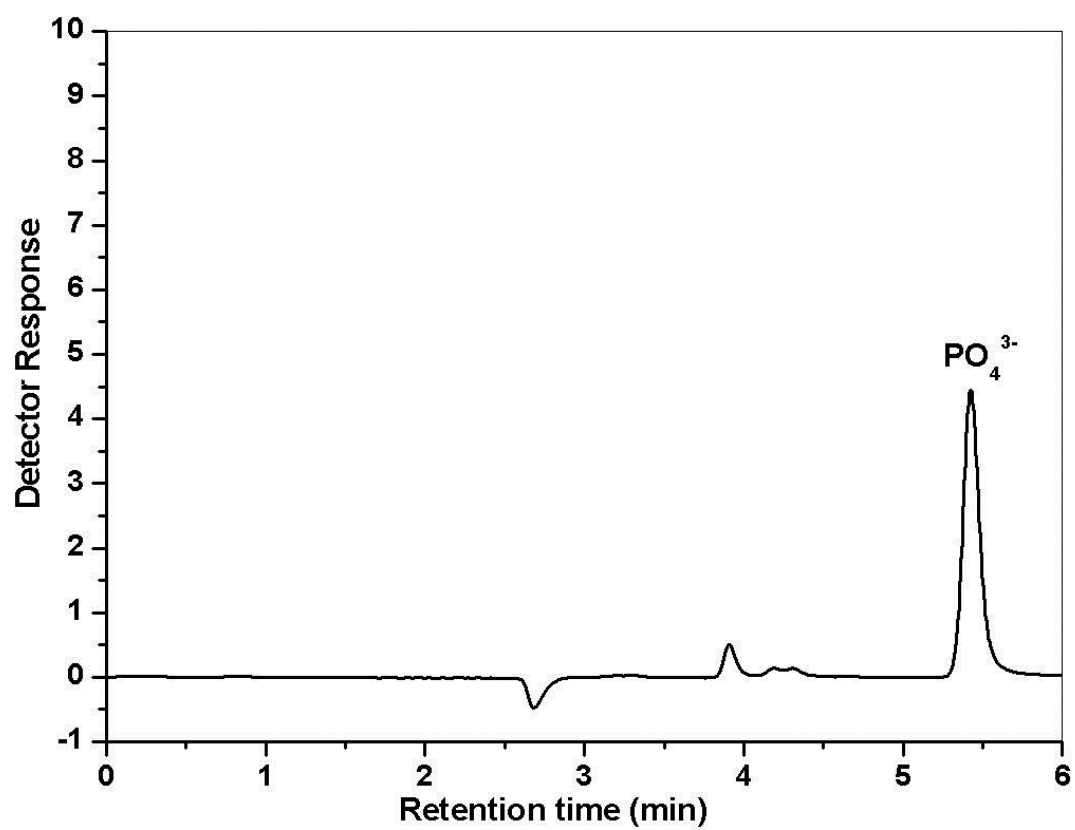

**Supplementary figure 2:** Chromatogram showing level of phosphate present in  $\text{H}_2\text{O}_2$  blank.

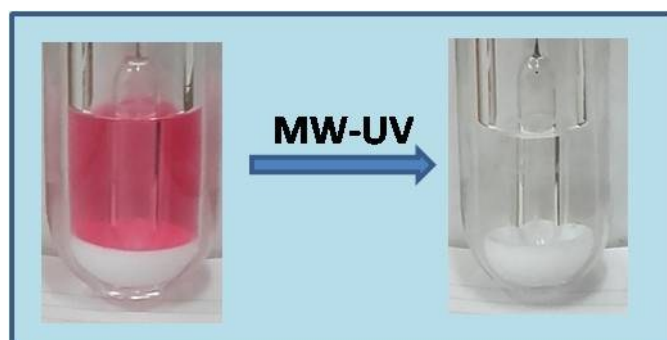

**Supplementary figure 3:** The photograph of digestion mixture before and after microwave assisted UV photo-digestion showing efficacy of mineralization.
